# Supplementary material
Source: PubMed Central journal article supplement (PMC2276448)
Supplement: plntcell_tpc.107.057752_1.pdf [file plntcell_tpc.107.057752_1.pdf]

Supplemental data. Hu et al. (2008). Potential sites of bioactive gibberellin production during reproductive growth in *Arabidopsis*.

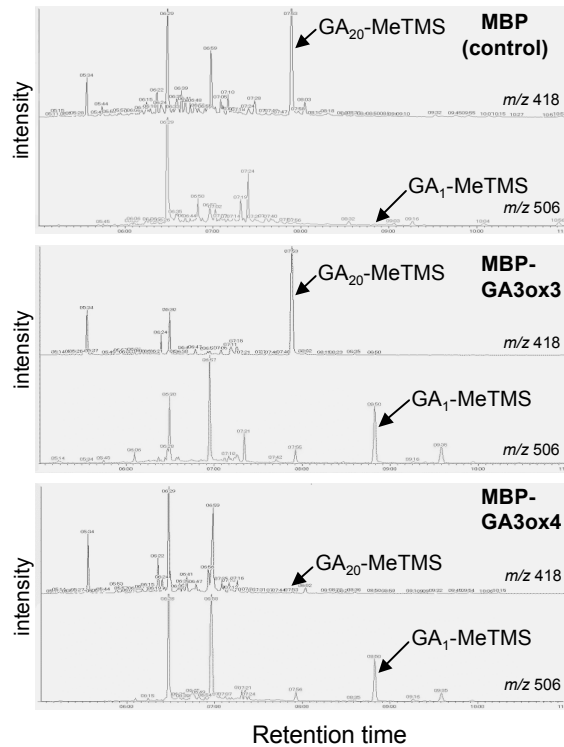

**Supplemental Figure 1. WT GA3ox3 and GA3ox4 proteins convert GA<sub>20</sub> to GA<sub>1</sub> in in vitro enzyme assays .**

GC-selected ion monitoring showing the conversion of GA<sub>20</sub> to GA<sub>1</sub> by maltose binding protein(MBP)-GA3ox3 and MBP-GA3ox4 fusion protein (the latter panels, respectively). Cell lysates containing MBP were used as a negative control (the first panel). GA<sub>20</sub> and GA<sub>1</sub> were identified as GA<sub>20</sub>- methyl ester-trimethylsilyl ether (GA<sub>20</sub>-MeTMS) and GA<sub>1</sub>- methyl ester-trimethylsilyl ether (GA<sub>1</sub>-MeTMS), respectively, after derivatization.

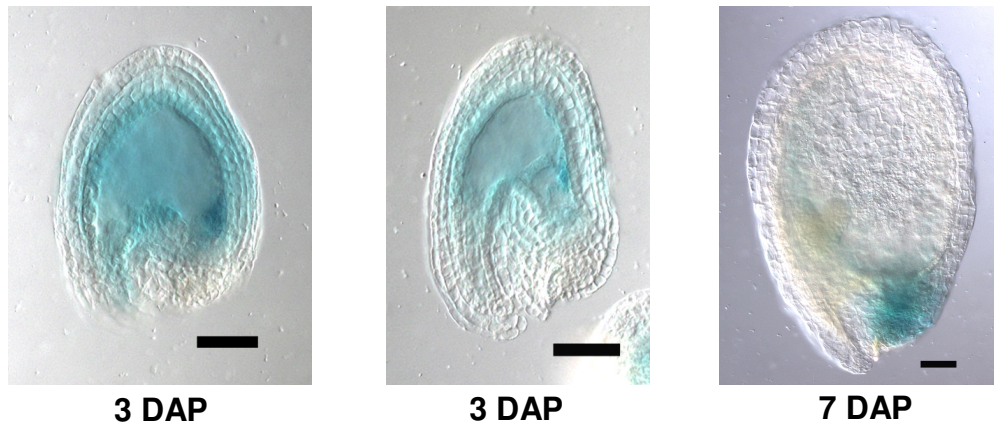

**Supplemental Figure 2. *GA3ox4-GUS* expression in embryos resulted from crosses between *GA3ox4-GUS* plants (pollen donors) and WT plants.**

DAP: Days after pollination. Bar: 50  $\mu$ M.

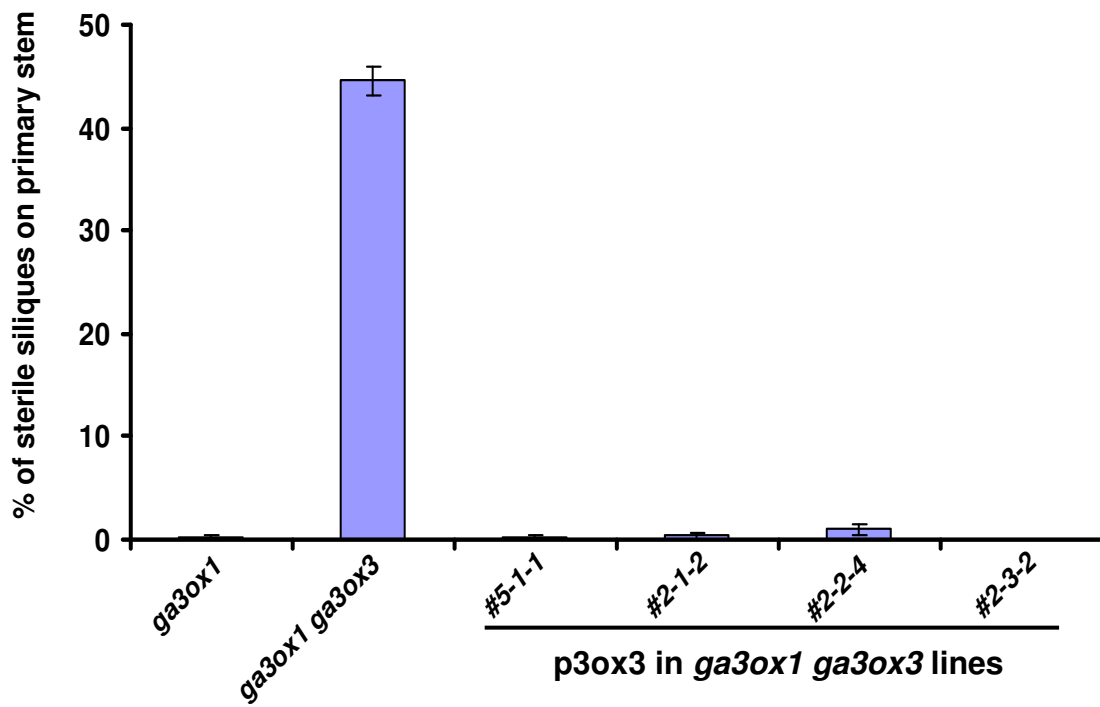

**Supplemental Figure 3. The *p3ox3/ga3ox1 ga3ox3* transformants rescued the sterile phenotype of *ga3ox1ga3ox3*.**

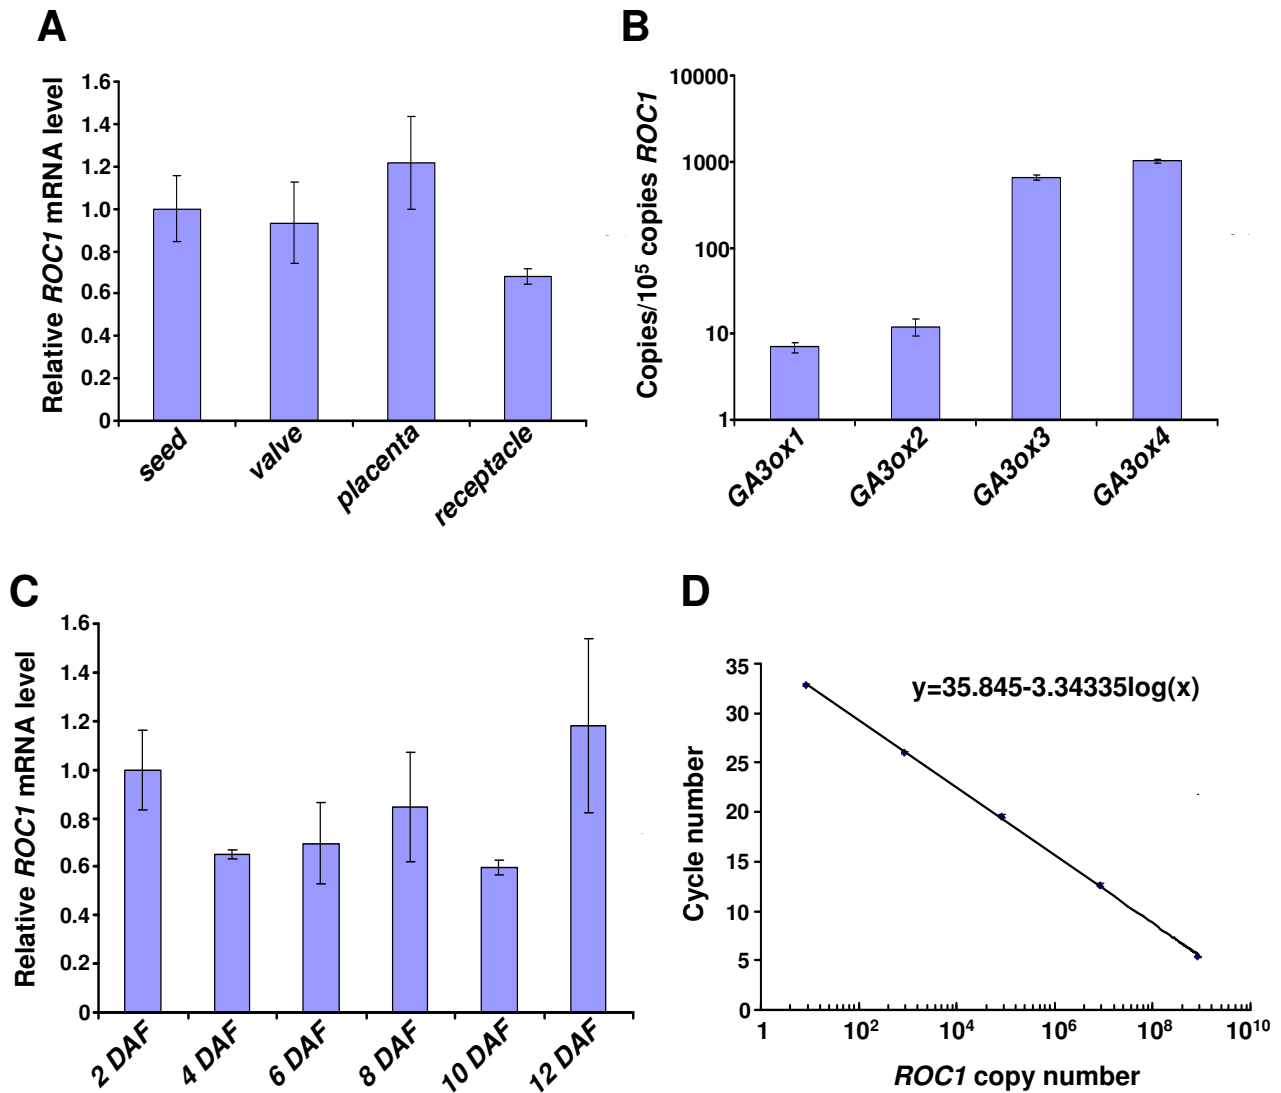

**Supplemental Figure 4. Expression of *ROC1* and *GA3ox* genes as determined by qRT-PCR.**

(A) Relative expression of *ROC1* in different parts of 6-8 DAF siliques, normalized by 18S rRNA levels. (B) Semi-log graph of *GA3ox* transcript levels in seeds of 6-8 DAF siliques. (C) Relative expression of *ROC1* in different silique stages, normalized by 18S rRNA levels. Means  $\pm$  S.E. of three technical replicates are shown in A-C. (D) Standard curve for *ROC1* quantification in real-time PCR.

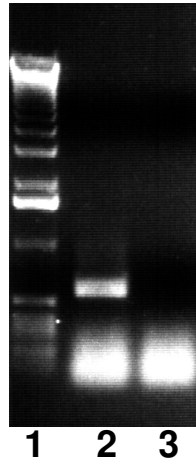

**Supplemental Figure 5. The *ga3ox3* mutant has no WT *GA3ox3* transcript.**

RT-PCR was performed using RNA isolated from siliques to detect WT *GA3ox3* transcripts. 1. 1 kb DNA ladder. 2. WT silique RNA was used for RT-PCR. 3. *ga3ox3* silique RNA was used for RT-PCR.

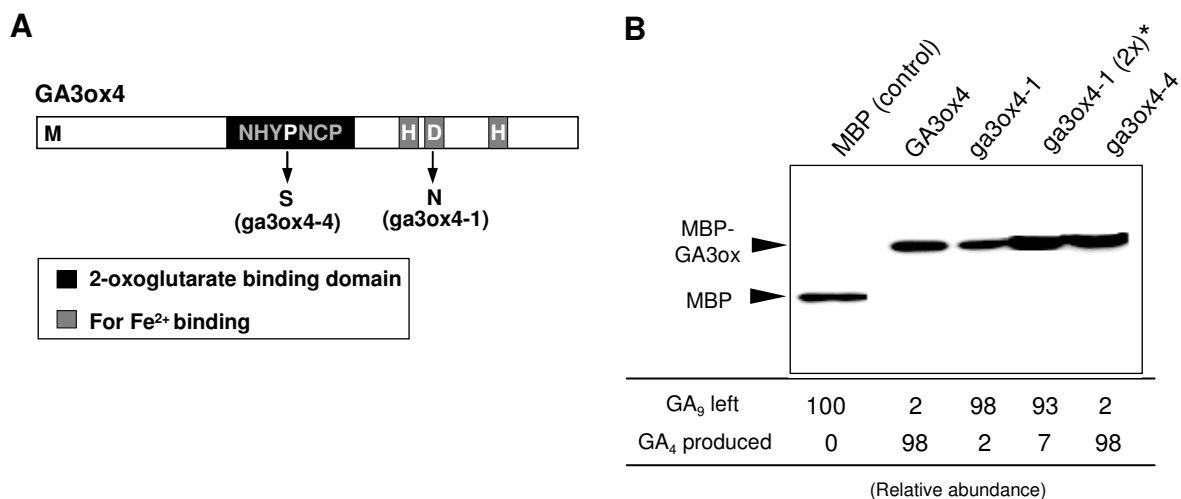

**Supplemental Figure 6. In vitro enzyme assays of GA3ox4 and mutant proteins *ga3ox4-1* and *ga3ox4-4*.**

(A) Positions of amino acid substitutions in the *ga3ox4-1* and *ga3ox4-4* mutant proteins. Both *ga3ox4-1* and *ga3ox4-4* mutants have a point mutation in the second exon resulting in an amino acid substitution within highly conserved functional domains of 2-oxoglutarate dependent dioxygenases (Xu et al., 1995; Hedden and Phillips, 2000). *ga3ox4-1* has a G-to-A mutation that resulted in an Asp-to-Asn substitution in the protein, which is likely to be inactive because this Asp residue is required for Fe<sup>2+</sup> binding. *ga3ox4-4* has a nucleotide change from a C-to-T resulting in a Pro-to-Ser amino acid substitution within the 2-oxoglutarate binding domain. The highly conserved functional domains for 2-oxoglutarate dependent dioxygenases (including GA3ox) are depicted.

(B) Immunoblot analysis to detect MBP (control) or MBP-GA3ox fusion proteins in soluble *E. coli* extracts using an anti-MBP antibody. The amount of GA<sub>9</sub> left after the reaction and the amount of GA<sub>4</sub> produced from GA<sub>9</sub> were quantified using deuterium-labeled GAs as internal standards and the relative levels (the sum of the substrate and the product was set to 100) are shown in a table below the blot. The \* indicates a sample that contained double the amount of *ga3ox4-1* extract, as the amount of MBP-*ga3ox4-1* detected from a similar volume of soluble *E. coli* extracts was smaller than that of MBP-GA3ox4. In vitro assays showed that the *ga3ox4-1* mutation almost completely abolished GA3ox enzymatic activity, as only very little GA<sub>4</sub> was made from GA<sub>9</sub>. This result suggested that biochemically, *ga3ox4-1* is a near-null mutant. Surprisingly, the *ga3ox4-4* mutant protein could convert most of the GA<sub>9</sub> into GA<sub>4</sub>, indicating that the enzyme activity is not dramatically affected by this mutation.

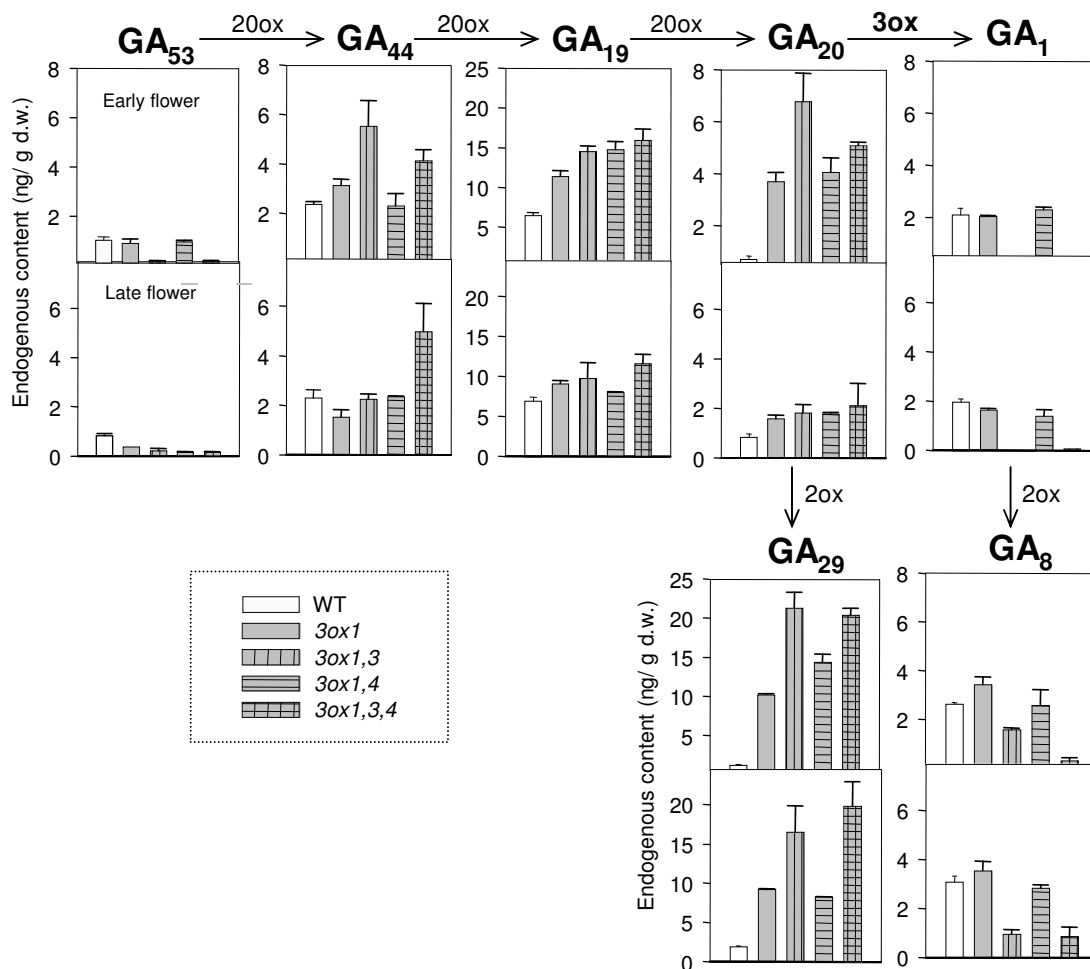

**Supplemental Figure 7. Levels of endogenous 13-OH GAs in flowers of WT and category II *ga3ox* mutant plants.**

GA levels in early (upper graphs) and late (lower graphs) flowers are presented.

Note that the y-axis scale for  $GA_{19}$  and  $GA_{29}$  is different from that for other GAs.

Early flowers: flower cluster from the primary inflorescence at anthesis of the first flower.

Late flowers: flower cluster from the primary inflorescence after 20-25 flowers already opened. Means  $\pm$  S.E. of three technical replicates are shown.

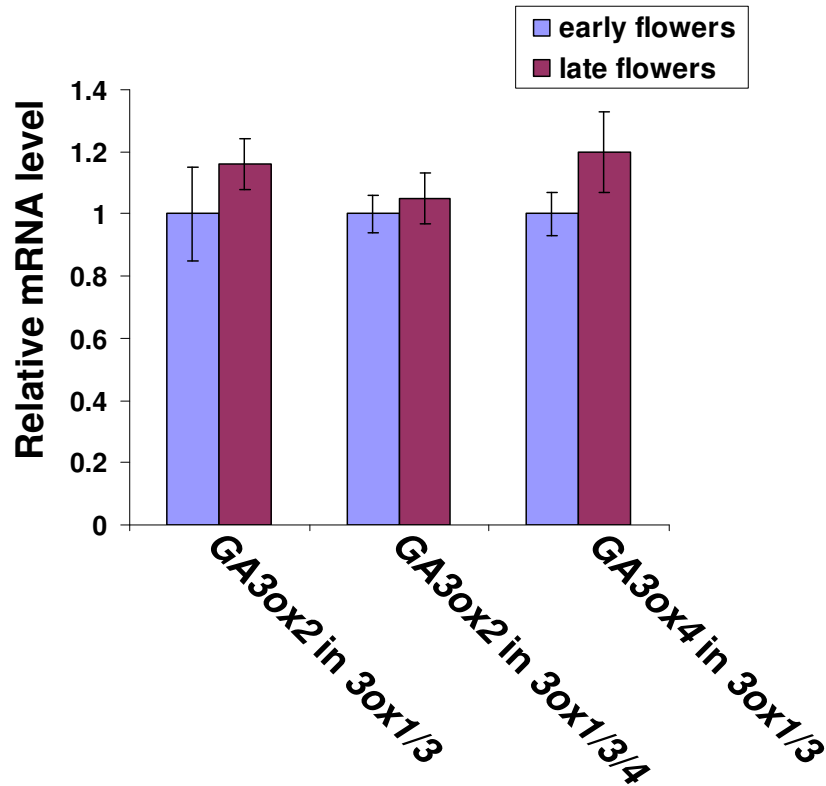

**Supplemental Figure 8. *GA3ox2* and *GA3ox4* expression in flowers of *ga3ox* mutants.**

Real-time RT-PCR was performed to compare the relative expression levels of *GA3ox2* and *GA3ox4* in early and late flowers of *ga3ox1 3ox3* and *ga3ox1 3ox3 3ox4*. *ROC1* was used as standard. Early flowers and late flowers are defined as in Supplemental Figure 3. Means  $\pm$  S.E. of three technical replicates are shown. Similar results were obtained in a second test using a different set of tissues.



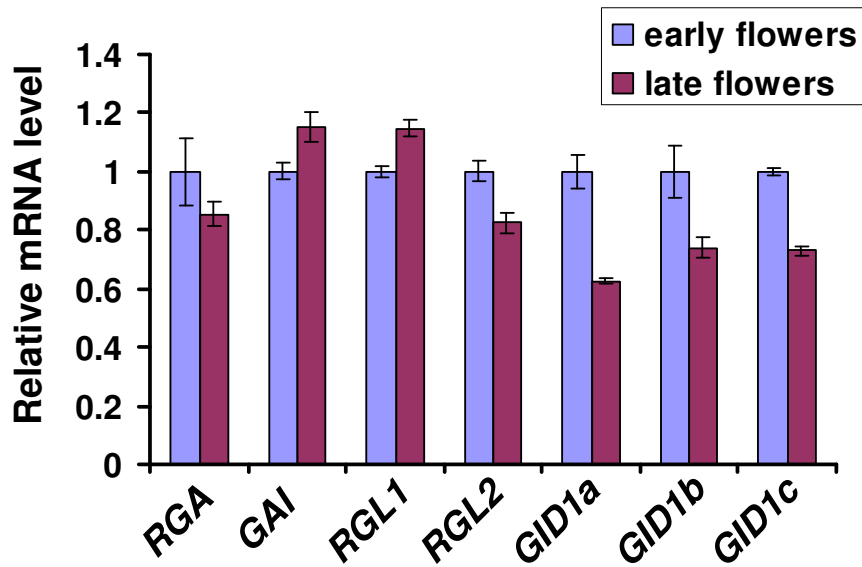

**Supplemental Figure 9. Transcript levels of *DELLA* and *GID1* genes in *ga3ox1 ga3ox3 ga3ox4* flowers.**

Relative mRNA levels of *DELLA* and *GID1* genes in early and late flowers of *ga3ox1 ga3ox3 ga3ox4* were determined by real-time RT-PCR, using *ROC1* as a standard. PCR primers for *DELLAs* and *GID1s* are described previously (Tyler et al., 2004; Griffiths et al., 2006). Early flowers and late flowers are defined as in Supplemental Figure 3. Means  $\pm$  S.E. of three technical replicates are shown. An independent test showed similar results.

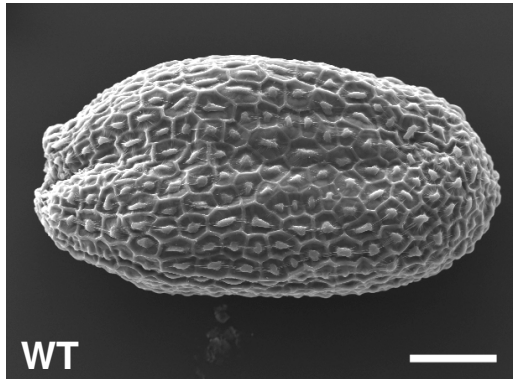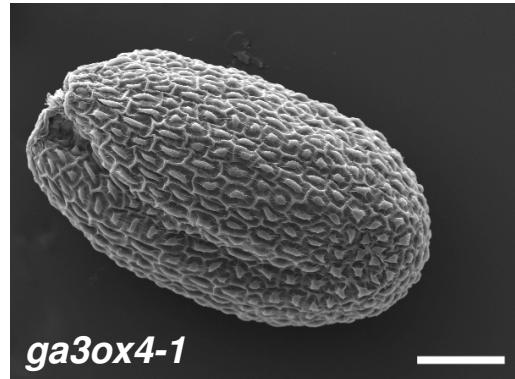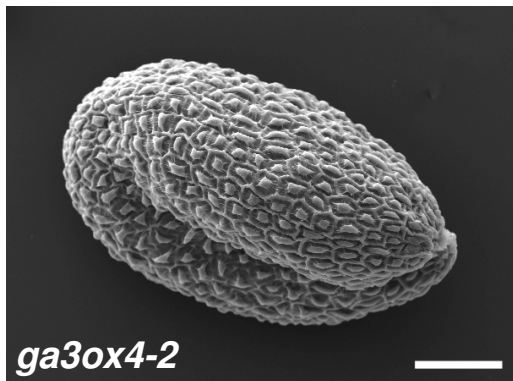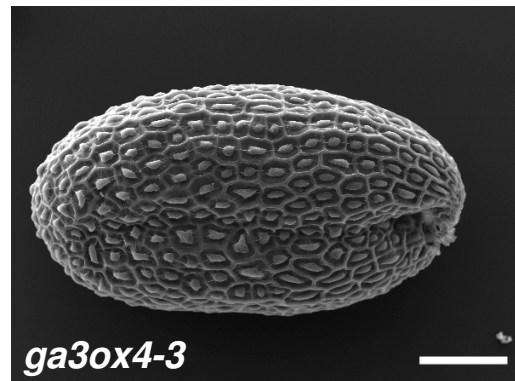

**Supplemental Figure 10. Scanning electron microscopy (SEM) of WT and *ga3ox4* mutant seeds.**

Bar: 100  $\mu$ m.

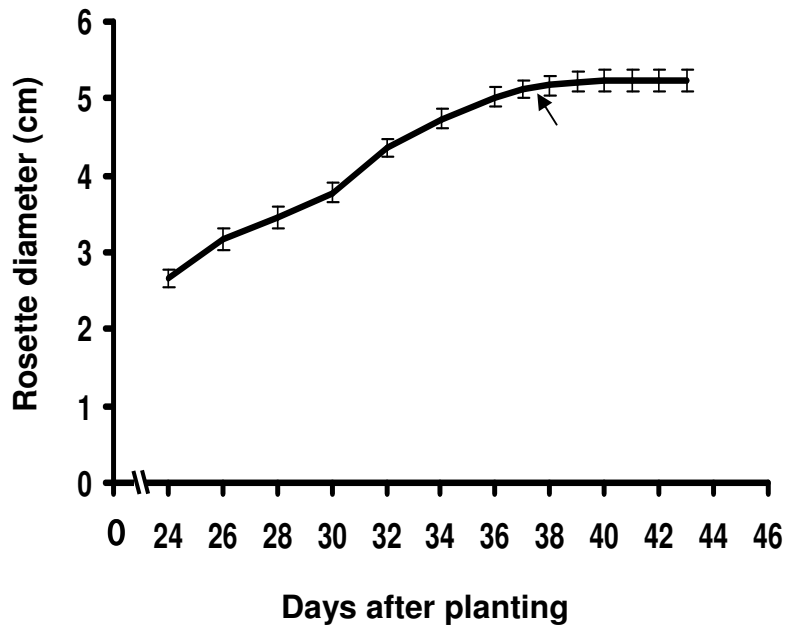

**Supplemental Figure 11. Rosette diameters of *ga3ox1 ga3ox3* after flower initiation.**

Arrow: average time when 1st flower opened ( $37.5 \pm 0.3$  days).

| Silique number | Carpel/Silique stage in Figure 4T | Embryo developmental stage | Silique or flower phenotype                     | Flower stage according to Bowman (1994) | Silique age according to Bowman (1994) |
|----------------|-----------------------------------|----------------------------|-------------------------------------------------|-----------------------------------------|----------------------------------------|
|                | carpel                            |                            | Petals level with long stamens                  | 12                                      |                                        |
|                | anthesis                          |                            | Bud opens; anther dehiscence; anthesis          | 13                                      | - 6 HAF                                |
| 1              | 0 HAF                             |                            | Long anthers extend above stigma; fertilization | 14                                      | 0 HAF                                  |
| 2              | 10 HAF                            |                            | Petals perpendicular to carpel                  | mid-14                                  |                                        |
| 3              | 20 HAF                            |                            | Stigma heavily pollinated                       | end of 14                               | 1 DAF                                  |
| 4              | 30 HAF                            |                            | Stigma extends above long anthers               | 15                                      |                                        |
| 5              | 40 HAF                            |                            | Stigma extends above long anthers               | 15                                      |                                        |
| 6              | 50 HAF                            |                            | Petals and sepals withering                     | 15-16                                   | 2 DAF                                  |
| 7              | 60 HAF                            |                            | All organs fall from siliques                   | start of 17                             | 2.5 DAF                                |
| 8              | 3 DAF                             |                            |                                                 | 17                                      |                                        |
| 10-11          | 4 DAF                             | globular                   |                                                 | 17                                      |                                        |
| 13-14          | 5 DAF                             | heart                      |                                                 | 17                                      |                                        |
| 15-16          | 6 DAF                             | torpedo                    |                                                 | 17                                      |                                        |
| 17-18          | 7 DAF                             | walking stick              |                                                 | 17                                      |                                        |
| 20-21          | 8 DAF                             | walking stick              |                                                 | 17                                      |                                        |
| 25-26          | 10 DAF                            | upturned U                 |                                                 | 17                                      | 10.5 DAF                               |
| 30-31          | 12 DAF                            | mature                     | Siliques turn yellow                            | 18                                      | 12 DAF                                 |

**Supplemental Table 1. List of flower and silique developmental stages.**

HAF: hour after flowering.

DAF: day after flowering.

|                         | <b>Flower time<br/>(days)</b> | <b>Rosette<br/>diameter (cm)</b> | <b>Final height<br/>(cm)</b> | <b>% of fertile<br/>siliques</b> | <b>Seed per<br/>fertile silique</b> |
|-------------------------|-------------------------------|----------------------------------|------------------------------|----------------------------------|-------------------------------------|
| <i>3ox1</i>             | 22.6 ± 0.2                    | 4.83 ± 0.09                      | 20.8 ± 0.6                   | 99.2 ± 0.3                       | 49.0 ± 1.0                          |
| <i>3ox1 3ox4-1</i>      | 23.6 ± 0.2                    | 4.96 ± 0.12                      | 23.3 ± 0.4                   | 95.8 ± 0.4                       | 47.0 ± 0.6                          |
| <i>3ox1 3ox4-3</i>      | 20.8 ± 0.2                    | 4.92 ± 0.09                      | 23.0 ± 0.3                   | 97.0 ± 0.4                       | 49.3 ± 0.6                          |
|                         |                               |                                  |                              |                                  |                                     |
| <i>3ox1 3ox3</i>        | 23.6 ± 0.2                    | 4.88 ± 0.13                      | 23.9 ± 0.6                   | 59.9 ± 1.9                       | 33.4 ± 1.0                          |
| <i>3ox1 3ox3 3ox4-1</i> | 24.0 ± 0.2                    | 5.13 ± 0.09                      | 23.9 ± 0.3                   | 54.7 ± 1.2                       | 30.6 ± 0.6                          |
| <i>3ox1 3ox3 3ox4-3</i> | 23.1 ± 0.2                    | 5.07 ± 0.18                      | 25.8 ± 0.3                   | 51.2 ± 1.5                       | 29.2 ± 0.7                          |

**Supplemental Table 2. Phenotype comparison of *ga3ox4-1* and *ga3ox4-3* in *ga3ox1* and *ga3ox1 ga3ox3* backgrounds.**

Rosette diameter was measured 24 days after sowing. Silique data were collected from primary inflorescence stem only. Fertile siliques contain at least one seed. All measurements are the means ± S.E. from 15-20 plants per genotype.

|                      | <b>Flowering time (days)</b> | <b>Flowering time (rosette leaf #)</b> | <b>Rosette diameter (cm)</b> | <b>Final height (cm)</b> | <b>% of fertile siliques</b> | <b>Seed per fertile silique</b> |
|----------------------|------------------------------|----------------------------------------|------------------------------|--------------------------|------------------------------|---------------------------------|
| <b>WT</b>            | 20.1 ± 1.2                   | 9.1 ± 0.7                              | 6.6 ± 0.8                    | 40.9 ± 1.9               | 97.9 ± 2.2                   | 57.2 ± 2.9                      |
| <i>ga3ox2</i>        | 18.8 ± 1.5                   | 8.7 ± 0.5                              | 7.1 ± 0.7                    | 42.8 ± 4.5               | 98.5 ± 2.0                   | 55.4 ± 3.8                      |
| <i>ga3ox3</i>        | 21.3 ± 1.1                   | 9.4 ± 0.6                              | 6.3 ± 0.7                    | 41.4 ± 1.9               | 96.5 ± 2.4                   | 54.3 ± 2.2                      |
| <i>ga3ox4</i>        | 22.4 ± 2.2                   | 9.3 ± 0.5                              | 6.7 ± 0.8                    | 42.2 ± 2.3               | 97.2 ± 2.9                   | 54.4 ± 4.1                      |
| <i>ga3ox2 ga3ox3</i> | 22.4 ± 2.1                   | 8.9 ± 0.5                              | 6.1 ± 0.8                    | 45.3 ± 4.1               | 98.3 ± 1.8                   | 54.4 ± 5.9                      |
| <i>ga3ox3 ga3ox4</i> | 20.6 ± 1.5                   | 9.0 ± 0.8                              | 7.3 ± 1.0                    | 41.2 ± 4.0               | 97.9 ± 2.1                   | 53.2 ± 5.4                      |

**Supplemental Table 3. Phenotypic characterization of category I *ga3ox* mutants in comparison to WT.**

All measurements are the means ± S.E. from 15-20 plants per genotype. Rosette diameter was measured 24 days after sowing.

Measurements of seeds in siliques were taken on primary inflorescence stems only. Fertile siliques contain at least one seed.

|                                  |                        | <i>ga3ox1 ga3ox3</i> | <i>ga3ox1 ga3ox3 ga3ox4</i> | <i>ga3ox1 ga3ox2 ga3ox3</i> |
|----------------------------------|------------------------|----------------------|-----------------------------|-----------------------------|
| <b>% of fertile siliques</b>     | <b>#1-5 siliques</b>   | 2.7 ± 1.8            | 1.5 ± 1.4                   | 0.0 ± 0.0                   |
|                                  | <b>#6-10 siliques</b>  | 28.0 ± 5.8           | 18.5 ± 4.9                  | 0.0 ± 0.0                   |
|                                  | <b>#11-15 siliques</b> | 14.7 ± 5.0           | 1.5 ± 1.4                   | 0.0 ± 0.0                   |
|                                  | <b>#16-20 siliques</b> | 25.3 ± 8.4           | 12.3 ± 5.0                  | 5.3 ± 3.1                   |
|                                  | <b>#21-25 siliques</b> | 72.0 ± 6.7           | 33.8 ± 6.1                  | 41.3 ± 7.7                  |
|                                  | <b>#26-30 siliques</b> | 90.7 ± 2.7           | 81.5 ± 4.5                  | 88.0 ± 4.3                  |
|                                  | <b>all siliques</b>    | 59.9 ± 1.9           | 51.2 ± 1.5                  | 45.8 ± 1.5                  |
| <b>Seeds per fertile silique</b> | <b>#1-5 siliques</b>   | 21.0 ± 20.0          | 1.0 ± 0.0                   | no fertile siliques         |
|                                  | <b>#6-10 siliques</b>  | 15.5 ± 3.3           | 11.9 ± 2.1                  | no fertile siliques         |
|                                  | <b>#11-15 siliques</b> | 15.2 ± 4.0           | 13.0 ± 0.0                  | no fertile siliques         |
|                                  | <b>#16-20 siliques</b> | 19.8 ± 5.7           | 10.0 ± 2.4                  | 11.3 ± 6.3                  |
|                                  | <b>#21-25 siliques</b> | 25.1 ± 2.2           | 16.9 ± 2.5                  | 20.7 ± 4.5                  |
|                                  | <b>#26-30 siliques</b> | 35.3 ± 2.2           | 19.5 ± 1.7                  | 35.1 ± 2.6                  |
|                                  | <b>all siliques</b>    | 33.4 ± 1.0           | 29.2 ± 0.7                  | 32.8 ± 1.8                  |

**Supplemental Table 4. Comparison of fertility in *ga3ox1 ga3ox3*, *ga3ox1 ga3ox3 ga3ox4* and *ga3ox1 ga3ox2 ga3ox3* mutants.**

Silique data were collected from primary inflorescence stem only. Fertile siliques contain at least one seed. All measurements are means ± S.E. from 13-15 plants per line.

**Supplemental Table 5. List of Primers and Their Uses**

| <b>Cloning</b>     |                                                  |                                                                                                                                               |                                                                          |
|--------------------|--------------------------------------------------|-----------------------------------------------------------------------------------------------------------------------------------------------|--------------------------------------------------------------------------|
| Primer             | Sequence                                         | Used for                                                                                                                                      | Notes                                                                    |
| 5'3ox32kbprSall    | 5'-ACGCGTCGACCATATCGAGTA<br>TGTCTTGGTGAACC       | Cloning of the whole 1.8<br>kb <i>GA3ox3</i> promoter                                                                                         | For construction of<br><i>GA3ox3-TC-GUS</i>                              |
| 3'3ox35'UTRBamHI   | 5'-CGCGGATCCCTGTGTGACAGA<br>GCTCAGGATT           |                                                                                                                                               |                                                                          |
| 5'3ox32kbprHindIII | 5'-CCCAAGCTTCATATCGAGTAT<br>GTCTTGGTGAACC        | Cloning of partial 1.2 kb<br><i>GA3ox3</i> promoter                                                                                           | For construction of<br><i>GA3ox3-TL-GUS</i>                              |
| 3'3ox3pr630up      | 5'-GATATGCTTTGATAGTCAAAT<br>CAAG                 |                                                                                                                                               |                                                                          |
| 5'3ox3pr750up      | 5'-GGAAGCCTACTAACACGAGG                          | Cloning of 1.55 kb<br><i>GA3ox3</i> fragment                                                                                                  | For construction of<br><i>GA3ox3-TL1-GUS</i>                             |
| 3'3ox3ex2BamHI     | 5'-CGCGGATCCCCCTAACGAGCC<br>CATCAACAT            | including 0.6 kb promoter,<br>first exon, intron and part<br>of second exon,                                                                  |                                                                          |
| 3'3ox3ex3BamHI     | 5'-CGCGGATCCTCTCGACCCTTCT<br>TCTTGTGG            | Cloning of 2.3 kb <i>GA3ox3</i><br>fragment including 0.6 kb<br>promoter, first two exons,<br>first two introns and part<br>of the third exon | For construction of<br><i>GA3ox3-TL2-GUS</i>                             |
| 3ox3-Ex5-Xmn       | 5'-GGAAGGATTTTCGATGAGCTCT<br>GTCACACAG           | Cloning of <i>GA3ox3</i><br>coding sequence                                                                                                   | For construction of<br>pMALc2- <i>GA3ox3</i>                             |
| 3ox3-Ex3'          | 5'-GGTAAGCTTTCAGCAACGGAA<br>CAAAGT               |                                                                                                                                               |                                                                          |
| 5'3ox41kbprSall    | 5'-ACGCGTCGACCTGTCTTCCGA<br>CTGAATTTCTTG         | Cloning of the whole 1.2<br>kb <i>GA3ox4</i> promoter                                                                                         | For construction of<br><i>GA3ox4-TC-GUS</i>                              |
| 3'3ox45'UTRSmaI    | 3'-TCCCCCGGGACTTGTGAACT<br>AATGAGAGAATGGG        |                                                                                                                                               |                                                                          |
| 3'3ox4ex2SmaI      | 5'-TCCCCCGGGAGACCCATGGCT<br>CGTTCTGGTTCAGGACAAAC | Cloning of <i>GA3ox3</i><br>promoter, first exon,<br>intron and part of second<br>exon                                                        | For construction of<br><i>GA3ox4-TL-GUS</i> ,<br>with<br>5'3ox41kbprSall |
| 5'3ox4BamHIpMAL    | 5'-CGCGGATCCATGCCTTCACTA<br>GCAGAAGAGATATG       | Cloning of <i>GA3ox4</i><br>coding sequence                                                                                                   | For construction of<br>pMALc2- <i>GA3ox4</i>                             |
| 3'3ox4SalIpMAL     | 3'-ACGCGTCGACTTAATTGGTGG<br>GATTAACGACCC         |                                                                                                                                               |                                                                          |



### T-DNA, TILLING Analysis

| Primer      | Sequence                                | Used for                                       | Notes                                                                                                                                                                               |
|-------------|-----------------------------------------|------------------------------------------------|-------------------------------------------------------------------------------------------------------------------------------------------------------------------------------------|
| 3ox3F       | 5'-TGAGCTCTGTCACACAGCTATTC<br>AAGAACAAC | Genotyping <i>GA3ox3</i>                       | WT allele 2 kb PCR product                                                                                                                                                          |
| 3ox3R       | 5'-CGGAACAAAGTCAAGGCTTTGTT<br>AAAGTGTG  |                                                |                                                                                                                                                                                     |
| JMLB1       | 5'-GGCAATCAGCTGTTGCCCGTCTC<br>ACTGGTG   | Genotyping <i>ga3ox3</i>                       | Mutant allele (with 3ox3F) 800 bp PCR product                                                                                                                                       |
| 3ox3Fint    | 5'-GCCGAGTTCTGCAATGTGATGGA<br>AG-3'     | RT-PCR of <i>GA3ox3</i>                        | cDNA product is 600 bp (with 3ox3R). DNA contamination has a 1.4 kb product                                                                                                         |
| 3ox4left    | 5'-CCGATGACTCCTACCGCAACCAT<br>T         | <i>GA3ox4</i> TILLING analysis                 |                                                                                                                                                                                     |
| 3ox4right   | 5'-CCTAATTGCGTCCATGGCCTTGT<br>C         |                                                |                                                                                                                                                                                     |
| CS94121F    | 5'-AGGCGCCATACGACTAAACCAG<br>TAC        | <i>ga3ox4-1</i> and <i>ga3ox4-4</i> genotyping | C to G mutation to generate dCAPs primer. PCR product is 305 bp. For <i>ga3ox4-1</i> , <i>HinFI</i> cuts WT allele only. For <i>ga3ox4-4</i> , <i>ScaI</i> cuts mutant allele only. |
| CS94121R    | 3'-CAGCTGGACCACCCATAAGTA<br>CGC         |                                                |                                                                                                                                                                                     |
| 3ox45'UTR-2 | 5'-CTACAACCCATCATGACAAGTCT<br>CATC      | Genotyping <i>GA3ox4-2</i> , <i>ga3ox4-2</i>   | WT allele 2.1 kb PCR product. Mutant allele (JMLB1+ 3ox4R) 1.8 kb PCR product                                                                                                       |
| 3ox4R       | 5'-TGGTGGGATTAACGACCCTAATT<br>GCGTCC    |                                                |                                                                                                                                                                                     |
| 3ox4F       | 5'-ATGCCTTCACTAGCAGAAGAGA<br>TATGTATTGG | Genotyping <i>GA3ox4-3</i> , <i>ga3ox4-3</i>   | WT allele (with 3ox4R) 1.5 kb PCR product; mutant allele (with JMLB1) 0.6 kb PCR product                                                                                            |

### Quantitative Applications

| Primer  | Sequence            | Used for         | Notes              |
|---------|---------------------|------------------|--------------------|
| Roc1Frt | 5'-ATCTACGGGAGCAAGT | <i>ROC1</i> qPCR | 225 bp PCR product |
| Roc1Rrt | 5'-GTCGGCTTTCCAGATG |                  |                    |

## SUPPLEMENTAL METHODS

### Absolute Expression Levels of *GA3ox* Genes

The standard curve of *ROCI* cDNA copy vs. cycle number is generated using linearized plasmid containing *ROCI* cDNA (pCG22; Lippuner et al., 1994), according to the same procedure as described in Tyler et al. (2004). The standard curve of cDNA copy vs. cycle number for each *GA3ox* gene was determined previously (Mitchum et al., 2006). Based on these standard curves, the cDNA copy numbers of *GA3ox* genes and *ROCI* can be determined according to their respective cycle numbers.

### RT-PCR

Total RNAs were extracted from *ga3ox3* or WT siliques as described in Methods. RT-PCR was performed using rTth DNA polymerase (Roche Diagnostics, Mannheim, Germany), according to product manual. *GA3ox3* intron-spanning primers (3ox3Fint + 3ox3R; Supplemental Table 5 online) were used in the reaction. PCR products were separated and visualized on 1.2% agarose gel.

### Construction of *GA3ox-GUS* and *MBP-GA3ox* Plasmids

All plasmid constructs containing PCR-amplified DNA inserts were sequenced to confirm that no mutations were introduced by PCR. Primer sequences are listed in Supplemental Table 5 online.

For making the *GA3ox3-GUS* plasmids, genomic DNA fragments for *GA3ox3* were amplified by PCR from *Arabidopsis* BAC Clone F17L22. Primers containing *SalI* and *BamHI* restriction sites (5'3ox32kbpr*SalI* and 3'3ox35'UTR*BamHI*) were used to amplify 1789 nucleotides of the *GA3ox3* promoter region for directional cloning into binary vector pBI101.1 upstream of the *GUS* reporter gene to generate p3ox3-TC-GUS. A three-step cloning process was used to construct p3ox3-TL1-GUS and p3ox3-TL2-GUS taking advantage of a native *HindIII* restriction site at position -721 in the *GA3ox3* promoter region. First, primer 5'3ox3750up and either 3'3ox3ex2*BamHI* or 3'3ox3ex3*BamHI* were used to generate 1548 and 2292 bp fragments, respectively. The fragments were digested with *HindIII* and *BamHI* and directionally cloned into the binary vector pBI101.1 to generate plasmid constructs 3ox3pr2kb-

Ex2 and 3ox3pr2kb-Ex3, respectively. In step two, primers 5'3ox32kbpr*Hind*III and 3'3ox3pr630up were used to amplify a 1191 bp fragment. The fragment was digested with *Hind*III and cloned into pBluescript SK+ to generate plasmid construct 3ox3pr*Hind*III. The 1191bp *Hind*III fragment from 3ox3pr*Hind*III was subcloned into 3ox3pr2Kb-Ex2 to generate p3ox3-TL1-GUS and 3ox3pr2kb-Ex3 to generate p3ox3-TL2-GUS.

For making the GA3ox4-GUS plasmids, genomic DNA fragments for *GA3ox4* were amplified by PCR from *Arabidopsis* BAC Clone F5I6. Primers containing *Sal*I and *Sma*I restriction sites (5'3ox41kbpr*Sal*I and 3'3ox45'UTR*Sma*I) were used to amplify 1157 nucleotides of the *GA3ox4* promoter region for directional cloning into binary vector pBI101.1 upstream of the *GUS* reporter gene to generate p3ox4-TC-GUS. Primers containing *Sal*I and *Sma*I restriction sites (5'3ox41kbpr*Sal*I and 3'3ox4ex2*Sma*I) were used to amplify 1157 nucleotides of the *GA3ox4* promoter region, exon 1, intron 1, and 201 nucleotides of exon 2 for directional cloning into binary vector pBI101.1 to generate p3ox4-TL-GUS.

For making the MBP-GA3ox expression constructs for in vitro enzyme assays, total RNA was isolated from siliques of 35-day-old plants of WT, *ga3ox4-1*, and *ga3ox4-4* using the RNeasy Kit and subjected to on-column DNase treatment (Qiagen, Valencia, CA). The First Strand cDNA Synthesis Kit for RT-PCR (Roche Diagnostics, Mannheim, Germany) was used to make cDNA from 1 µg of RNA. Primers containing *Bam*HI and *Sal*I restriction sites (5'3ox4*Bam*HIpMAL and 3'3ox4*Sal*IpMAL) were used to amplify and directionally clone the WT and mutant forms of GA3ox4 into the *E.coli* expression vector pMALc2 (New England Biolabs, Beverly, MA). Primers containing *Xmn*I and *Hind*III restriction sites (3ox3-Ex5-*Xmn* and 3ox3 Ex3') were used to amplify and directionally clone *GA3ox3* into pMALc2.

### **Identification of *ga3ox4* Alleles by TILLING**

The *ga3ox4-1* and *ga3ox4-4* mutants were identified via the *Arabidopsis* TILLING (Targeting Induced Local Lesions in Genomes) Project (Henikoff et al., 2004). Cy-3 and Cy-5 labeled oligonucleotide primers (3ox4left and 3ox4right, Supplemental Table 5 online) spanning 1047 nucleotides (410-1456) of the *GA3ox4* gene were used to screen for *ga3ox4* mutations at the *Arabidopsis* TILLING Center (University of Washington). M3 seeds corresponding to two mutants with predicted deleterious mutations were requested from the TILLING center and characterized in more detail. CS91343 (*ga3ox4-1*) had a G-to-A change at nucleotide 1094.

CS94121 (*ga3ox4-4*) had a C-to-T substitution at nucleotide 1046. Homozygous mutant plants were identified by PCR using allele-specific dCAPs primers (CS94121F+CS94121R; Supplemental Table 5 online) designed using the dCAPs Finder 2.0 Website (<http://helix.wustl.edu/dcaps/dcaps.html>; Neff et al., 2002). The *ga3ox4-1* allele was backcrossed three times to remove the *erecta* allele that was present in the parental background, and additional mutations induced by EMS.

### **Scanning Electron Microscopy**

Col-0 and *ga3ox4* mutant seeds were first coated with gold/platinum (60%/40%) in a sputter coater (Hummer 6.2, Anatech, Ltd., Springfield, VA) and then visualized using an ESEM (Philips XL30 ESEM TMP, FEI Company, Hillsboro, OR) at 25 kV. Images were captured by the SEM integrated camera.

## SUPPLEMENTAL REFERENCES

- Bowman, J.** (1994). *Arabidopsis: An atlas of morphology and development.* (New York: Springer-Verlag).
- Griffiths, J., Murase, K., Rieu, I., Zentella, R., Zhang, Z.L., Powers, S.J., Gong, F., Phillips, A.L., Hedden, P., Sun, T.P., and Thomas, S.G.** (2006). Genetic characterization and functional analysis of the *GID1* gibberellin receptors in *Arabidopsis*. *Plant Cell* **18**, 3399-3414.
- Hedden, P., and Phillips, A.L.** (2000). Gibberellin metabolism: New insights revealed by the genes. *Trends Plant Sci.* **5**, 523-530.
- Henikoff, S., Till, B.J., and Comai, L.** (2004). TILLING. Traditional mutagenesis meets functional genomics. *Plant Physiol.* **135**, 630-636.
- Lippuner, V., Chou, I.T., Scott, S.V., Ettinger, W.F., Theg, S.M., and Gasser, C.S.** (1994). Cloning and characterization of chloroplast and cytosolic forms of cyclophilin from *Arabidopsis thaliana*. *J. Biol. Chem.* **269**, 7863-7868.
- Mitchum, M.G., Yamaguchi, S., Hanada, A., Kuwahara, A., Yoshioka, Y., Kato, T., Tabata, S., Kamiya, Y., and Sun, T.P.** (2006). Distinct and overlapping roles of two gibberellin 3-oxidases in *Arabidopsis* development. *Plant J.* **45**, 804-818.
- Neff, M.M., Turk, E., and Kalishman, M.** (2002). Web-based primer design for single nucleotide polymorphism analysis. *Trends Genet.* **18**, 613-615.
- Tyler, L., Thomas, S.G., Hu, J., Dill, A., Alonso, J.M., Ecker, J.R., and Sun, T.-p.** (2004). *DELLA* proteins and gibberellin-regulated seed germination and floral development in *Arabidopsis*. *Plant Physiol.* **135**, 1008-1019.
- Xu, Y.-L., Li, L., Wu, K., Peeters, A.J.M., Gage, D.A., and Zeevaart, J.A.D.** (1995). The *GA5* locus of *Arabidopsis thaliana* encodes a multifunctional gibberellin 20-oxidase: Molecular cloning and functional expression. *Proc. Natl. Acad. Sci. USA* **92**, 6640-6644.
